# Supplementary material
Source: MDPI journal article supplement (https://www.mdpi.com/2227-9717/9/4/706)
Supplement: s1 [file s1]

Supplementary Materials

# Tuning Metal-Support Interactions on Ni/Al<sub>2</sub>O<sub>3</sub> Catalysts to Improve Catalytic Activity and Stability for Dry Reforming of Methane

Lulu He <sup>1</sup>, Yuanhang Ren <sup>1</sup>, Bin Yue <sup>1,\*</sup>, Shik Chi Edman Tsang <sup>2</sup>, and Heyong He <sup>1,\*</sup>

<sup>1</sup> Department of Chemistry and Shanghai Key Laboratory of Molecular Catalysis and Innovative Materials, Fudan University, Shanghai 200438, China; 14110220027@fudan.edu.cn (L.H.); yuanhangren@fudan.edu.cn (Y.R.)

<sup>2</sup> Wolfson Catalysis Centre, Department of Chemistry, University of Oxford, Oxford OX1 3QR, UK; edman.tsang@chem.ox.ac.uk

\* Correspondence: yuebin@fudan.edu.cn (B.Y.); heyonghe@fudan.edu.cn (H.H.); Tel.: +86-21-3124-3916 (H.H.); Fax: +86-21-3124-5572 (H.H.)

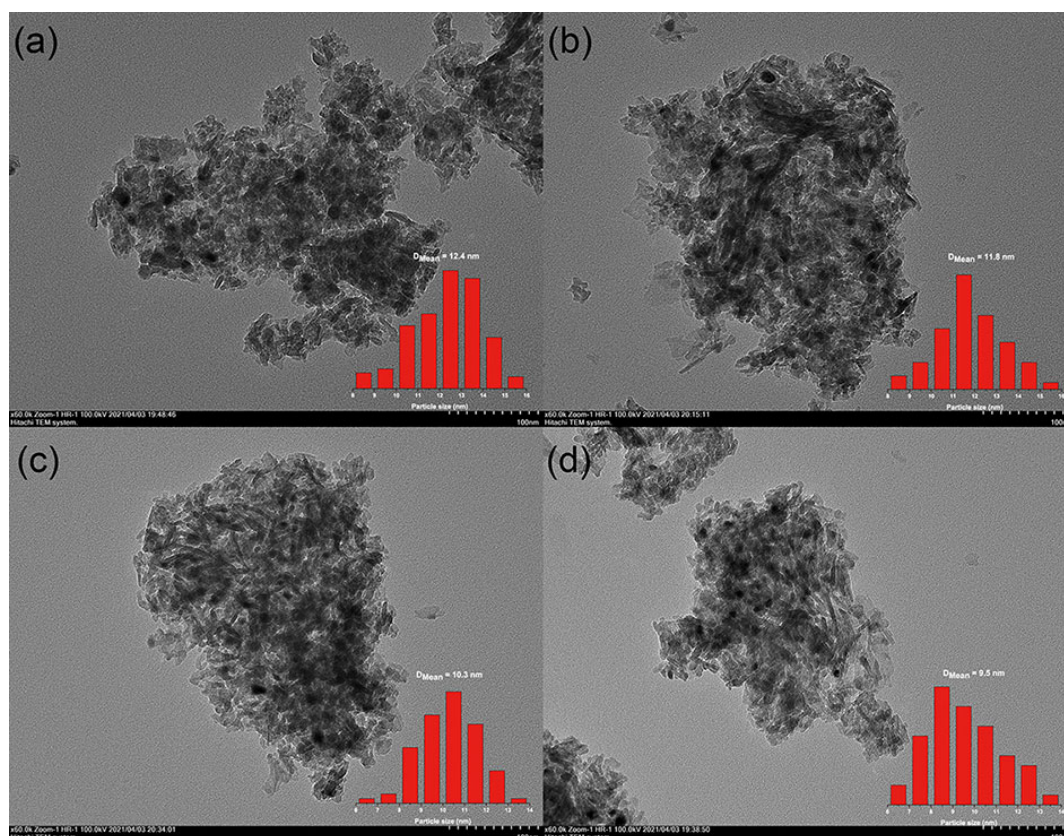

**Figure S1.** TEM images and Ni particle size distributions of the reduced catalysts: (a) Ni/Al<sub>2</sub>O<sub>3</sub>-450, (b) Ni/Al<sub>2</sub>O<sub>3</sub>-550, (c) Ni/Al<sub>2</sub>O<sub>3</sub>-650, and (d) Ni/Al<sub>2</sub>O<sub>3</sub>-750.

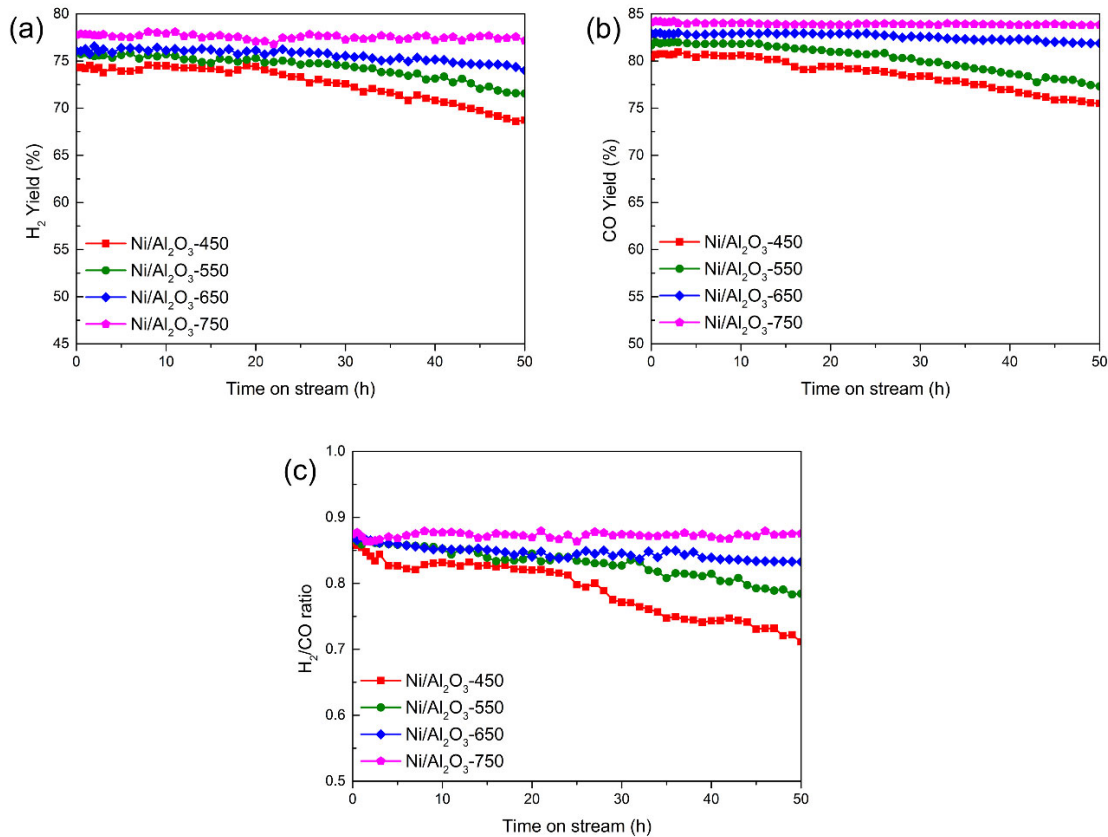

**Figure S2.** (a) H<sub>2</sub> yield, (b) CO yield and (c) H<sub>2</sub>/CO ratio as the function of time for stream of Ni/Al<sub>2</sub>O<sub>3</sub>-x catalysts (50 h test). Reaction conditions: CH<sub>4</sub>:CO<sub>2</sub>:Ar = 1:1:3, GHSV = 24000 mL g<sup>-1</sup> h<sup>-1</sup>, 700 °C, atmospheric pressure.

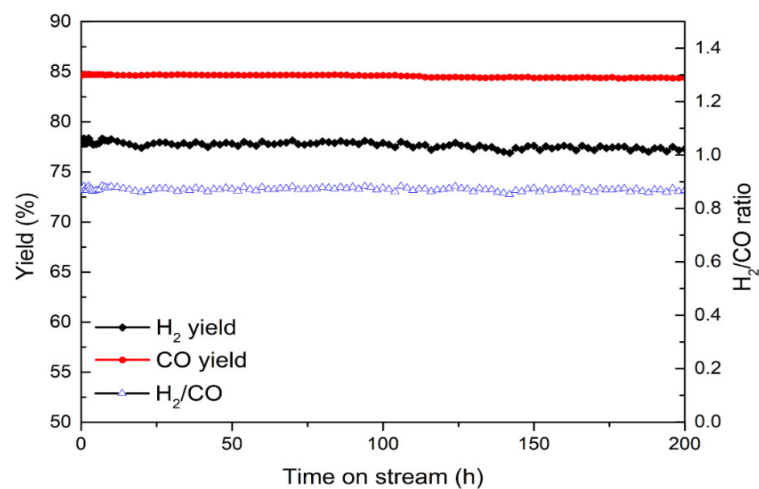

**Figure S3.** H<sub>2</sub> yield, CO yield and H<sub>2</sub>/CO ratio of Ni/Al<sub>2</sub>O<sub>3</sub>-750 catalyst in the long-term stability (200 h) test for dry reforming of methane reaction. Reaction conditions: CH<sub>4</sub>:CO<sub>2</sub>:Ar = 1:1:3, GHSV = 24000 mL g<sup>-1</sup> h<sup>-1</sup>, 700 °C, atmospheric pressure.

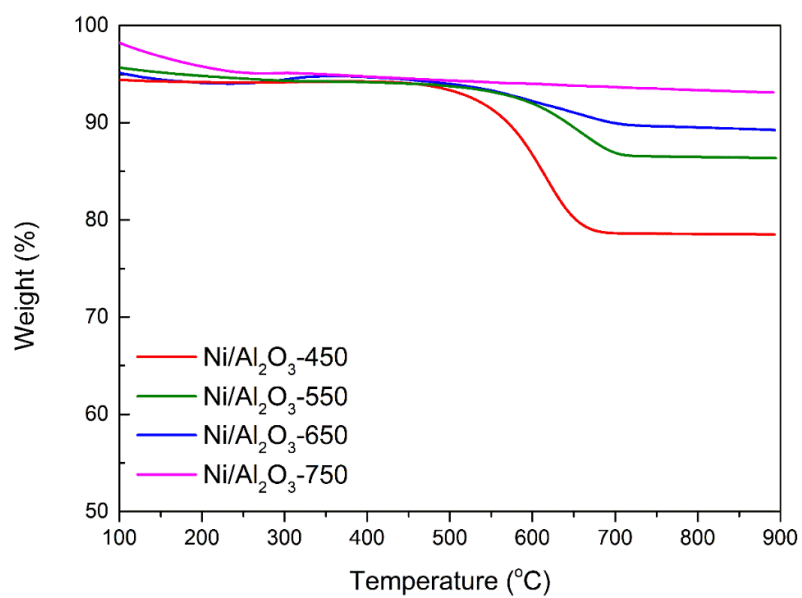

**Figure S4.** TG analysis of spent Ni/Al<sub>2</sub>O<sub>3</sub>-x catalysts after the 50 h reaction.
